# Supplementary material
Source: publisher site journal article supplement (https://kjim.org/upload/media/kjim-2023-358-Supplementary-Fig-1.pdf)
Supplement: Supplementary file 1 [file kjim-2023-358-Supplementary-Fig-1.pdf]

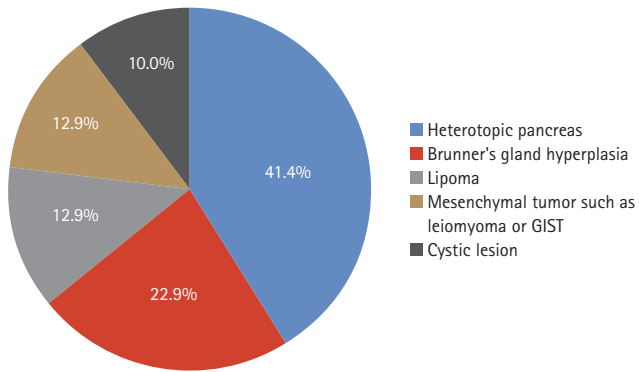

**Supplementary Figure 1.** Assessments of 70 duodenal subepithelial lesions which were evaluated using endoscopic ultrasound. Among 396 duodenal subepithelial lesions, 70 (17.7%) were evaluated by endoscopic ultrasound. GIST, gastrointestinal stromal tumor.
